# Supplementary material for: Magnetic core–shell Fe3O4@Cu2O and Fe3O4@Cu2O–Cu materials as catalysts for aerobic oxidation of benzylic alcohols assisted by TEMPO and N-methylimidazole
Source: PubMed Central journal article supplement — RSC Adv. 2020 Jul 10;10(44):26142–50. doi: 10.1039/d0ra04064a (PMC9055318; doi:10.1039/d0ra04064a), 2020-07-10
Supplement: RA-010-D0RA04064A-s001.pdf [file RA-010-D0RA04064A-s001.pdf]

## Electronic Supplementary Information

### Magnetic core-shell Fe<sub>3</sub>O<sub>4</sub>@Cu<sub>2</sub>O and Fe<sub>3</sub>O<sub>4</sub>@Cu<sub>2</sub>O-Cu materials as the catalysts for aerobic oxidation of benzylic alcohols assisted with TEMPO and N-methylimidazole

Binyu Xu,<sup>a</sup> Samuthirarajan Senthilkumar,<sup>b</sup> Wei Zhong,<sup>\*b</sup> Zhongquan Shen,<sup>b</sup> Chunxin Lu<sup>b</sup> and Xiaoming Liu<sup>\*a,b</sup>

<sup>a</sup>School of Chemistry, Nanchang University, Nanchang, Jiangxi, China

<sup>b</sup>College of Biological, Chemical Sciences and Engineering, Jiaying University, Jiaying, Zhejiang, China.

Email: weizhong@mail.zjxu.edu.cn; xiaoming.liu@mail.zjxu.edu.cn

| S. No | Table of Contents<br>Contents                                                                                                                                 | Page No. |
|-------|---------------------------------------------------------------------------------------------------------------------------------------------------------------|----------|
| 1.    | Synthesis of Cu <sub>2</sub> O nanoparticles & TEMPOH                                                                                                         | S2       |
| 2.    | Table S1 EDX analysis of the core-shell Fe <sub>3</sub> O <sub>4</sub> @Cu <sub>2</sub> O nanomaterial.                                                       | S2       |
| 3.    | Fig. S1 Calibration curve for the calculation of Cu/Cu <sub>2</sub> O content in Fe <sub>3</sub> O <sub>4</sub> @Cu <sub>2</sub> O-Cu catalysts.              | S3       |
| 4.    | Table S2 Comparison of powder XRD Strength and calculation of Cu/Cu <sub>2</sub> O content in Fe <sub>3</sub> O <sub>4</sub> @Cu <sub>2</sub> O-Cu catalysts. | S3       |
| 5.    | Table S3 Calculation of average crystal size from p-XRD analysis using Scherer equation.                                                                      | S4       |
| 6.    | Fig. S2 Comparison of p-XRD spectra of Fe <sub>3</sub> O <sub>4</sub> @Cu <sub>2</sub> O nanomaterial.                                                        | S4       |
| 7.    | Fig. S3 Effect of temperature in the aerobic oxidation of benzylic alcohols using Fe <sub>3</sub> O <sub>4</sub> @Cu <sub>2</sub> O.                          | S5       |
| 8.    | Fig. S4 Comparison of p-XRD spectra of fresh and reused catalysts of Fe <sub>3</sub> O <sub>4</sub> @Cu <sub>2</sub> O-Cu nanomaterial.                       | S5       |
| 9.    | Fig. S5 XPS results of fresh catalyst of Fe <sub>3</sub> O <sub>4</sub> @Cu <sub>2</sub> O-Cu-7 nanomaterial.                                                 | S6       |
| 10.   | Fig. S6 Comparison for the effect of TEMPO and TEMPOH on the catalysis.                                                                                       | S6       |
| 11.   | Fig. S7 Comparison of XPS results of fresh and reused catalysts of Fe <sub>3</sub> O <sub>4</sub> @Cu <sub>2</sub> O-Cu-7 nanomaterial.                       | S7       |
| 12.   | Fig. S8 Comparison of FTIR spectroscopy for Fe <sub>3</sub> O <sub>4</sub> @Cu <sub>2</sub> O before (black) and after (red) use.                             | S7       |
| 13.   | Table S4 The binding energies (eV) of XPS results of Cu, O, N in Fe <sub>3</sub> O <sub>4</sub> @Cu <sub>2</sub> O nanomaterial.                              | S8       |
| 14.   | Table S5 The binding energies (eV) of XPS results of Cu, O, N in Fe <sub>3</sub> O <sub>4</sub> @Cu <sub>2</sub> O-Cu-7 nanomaterial.                         | S8       |
| 15.   | Fig. S9 <sup>1</sup> H-NMR spectrum of TEMPOH                                                                                                                 | S9       |
| 16.   | Fig. S10 <sup>13</sup> C-NMR spectrum of TEMPOH                                                                                                               | S9       |
| 17.   | References                                                                                                                                                    | S10      |

### Synthesis of Cu<sub>2</sub>O nanoparticles:

The cubic Cu<sub>2</sub>O nanocrystals were synthesized by following the reported procedure.<sup>1</sup> About 5 mL of NaOH (2.0 mol/L) was added dropwise into 50 mL of aqueous CuCl<sub>2</sub> (0.01 mol/L) at 55 °C. After adequate stirring for 30 minutes, 5 mL of ascorbic acid solution (0.6 mol/L) was added dropwise into the solution. The mixed solution was adequately stirred 5 hours at 55 °C. The resulting precipitate was collected by centrifugation and decanting, then washed with distilled water and absolute ethanol, and finally dried in vacuum at room temperature for 12 hours. The as prepared catalyst was used for the TEMPO assisted aerobic oxidation of alcohols.

### Synthesis of TEMPOH:

The synthesis of TEMPOH was following the reported procedure.<sup>2</sup> TEMPO (0.5 g, 3.2 mmol) was added into a round flask charged with sodium ascorbate (1.0 g, 5.3 mmol) and H<sub>2</sub>O (9 mL). Then the suspension was stirred vigorously at room temperature until completely decolorized with the appearance of a white precipitate. The resulting suspension was extracted with diethyl ether. Afterward, the ether extracts were washed with water and brine, dried over anhydrous sodium sulfate and evaporated under reduced pressure to provide TEMPOH. (white solid, 476 mg, 94.6%). <sup>1</sup>H NMR (400 MHz, CDCl<sub>3</sub>, ppm): δ 1.49 (s, 6H), 1.14 (s, 12H); <sup>13</sup>C NMR (101 MHz, CDCl<sub>3</sub>, ppm): δ 58.5, 39.4, 16.9.

**Table S1** EDX analysis of the core-shell Fe<sub>3</sub>O<sub>4</sub>@Cu<sub>2</sub>O nanomaterial.

| Catalyst                                          | C(%)  | O(%)  | N(%) | Fe(%) | Cu(%) | Cu:Fe (mol. ratio) |
|---------------------------------------------------|-------|-------|------|-------|-------|--------------------|
| Fe <sub>3</sub> O <sub>4</sub>                    | 7.06  | 28.44 | -    | 64.51 | -     |                    |
| Fe <sub>3</sub> O <sub>4</sub> /L-Lys             | 10.12 | 29.72 | 4.62 | 55.54 | -     |                    |
| Fe <sub>3</sub> O <sub>4</sub> @Cu <sub>2</sub> O | 14.86 | 21.73 | 1.37 | 12.83 | 49.22 | 3.8:1              |

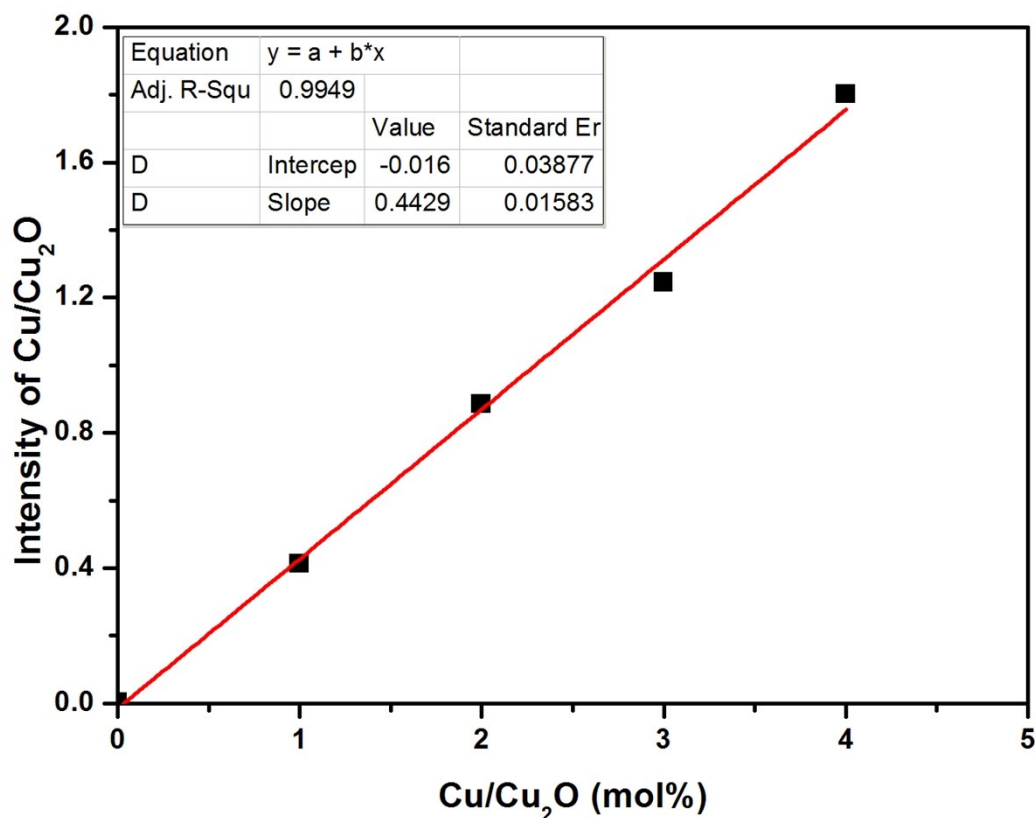

**Fig. S1** Calibration curve for the calculation of Cu/Cu<sub>2</sub>O content in Fe<sub>3</sub>O<sub>4</sub>@Cu<sub>2</sub>O-Cu catalysts.

**Table S2** Comparison of powder XRD strength and calculation of Cu/Cu<sub>2</sub>O content in Fe<sub>3</sub>O<sub>4</sub>@Cu<sub>2</sub>O-Cu catalysts.

| Catalyst preparation time / hrs | Intensity of Cu <sub>2</sub> O (111) plane | Intensity of Cu (111) plane | Cu:Cu <sub>2</sub> O |
|---------------------------------|--------------------------------------------|-----------------------------|----------------------|
| 4                               | 476                                        | 30                          | 0.18                 |
| 5                               | 410                                        | 51                          | 0.32                 |
| 7                               | 457                                        | 197                         | 1.01                 |
| 9                               | 1038                                       | 874                         | 1.94                 |
| 12                              | 750                                        | 1082                        | 3.29                 |
| 24                              | 163                                        | 2596                        | 36.00                |

**Table S3** Calculation of average crystal size from *p*-XRD analysis using Scherrer's formula.

Scherrer's equation for average crystal size,  $D = K\gamma / B \cos\theta$ .

|                   | crystal plane | $2\theta / ^\circ$ | B     | D / nm | Average Size (in nm) |
|-------------------|---------------|--------------------|-------|--------|----------------------|
| Cu <sub>2</sub> O | (111)         | 36.404             | 0.690 | 11.984 |                      |
|                   | (200)         | 42.305             | 0.458 | 18.391 | 16.19                |
|                   | (220)         | 61.45              | 0.502 | 18.204 |                      |

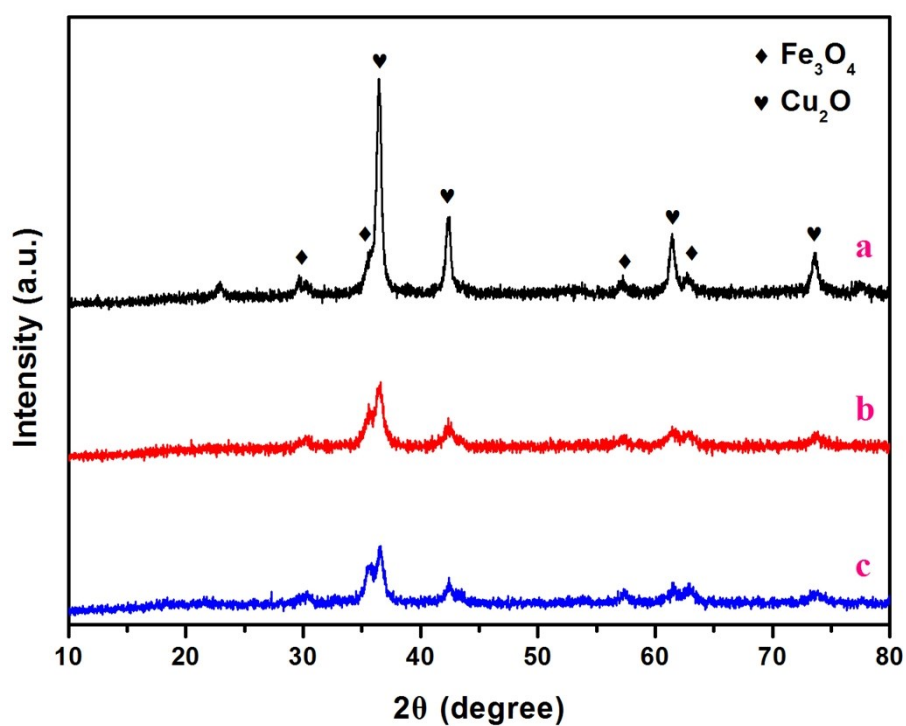

**Fig. S2** Comparison of *p*-XRD spectra of Fe<sub>3</sub>O<sub>4</sub>@Cu<sub>2</sub>O nanomaterial (a) fresh catalyst (b) 4<sup>th</sup> recycle and (c) 7<sup>th</sup> recycle.

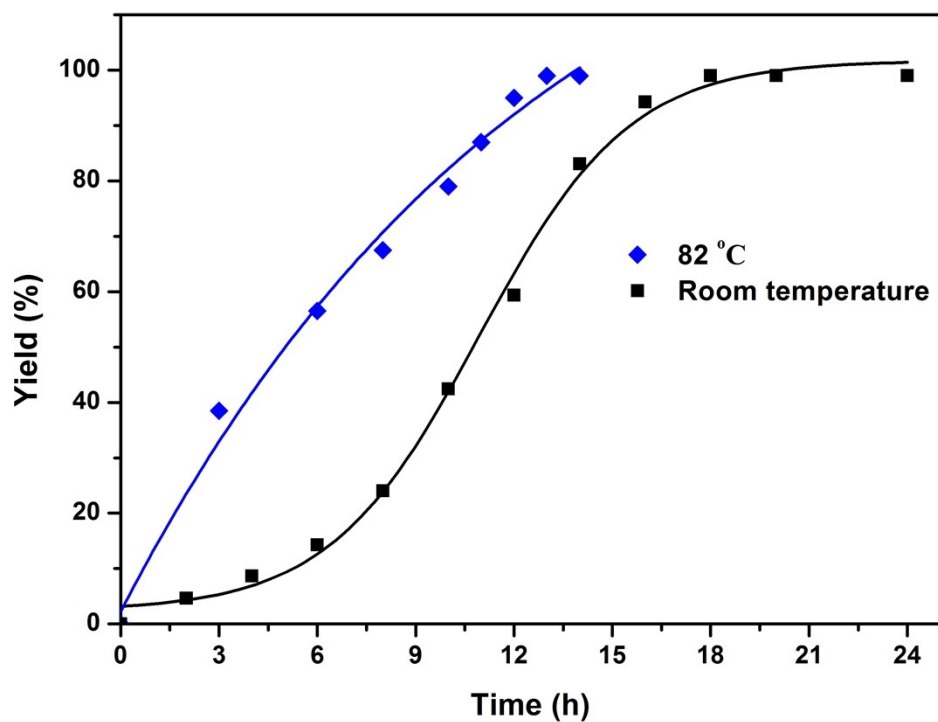

**Fig. S3** Effect of temperature on the aerobic oxidation of benzyl alcohol catalysed by  $\text{Fe}_3\text{O}_4@\text{Cu}_2\text{O}$ .

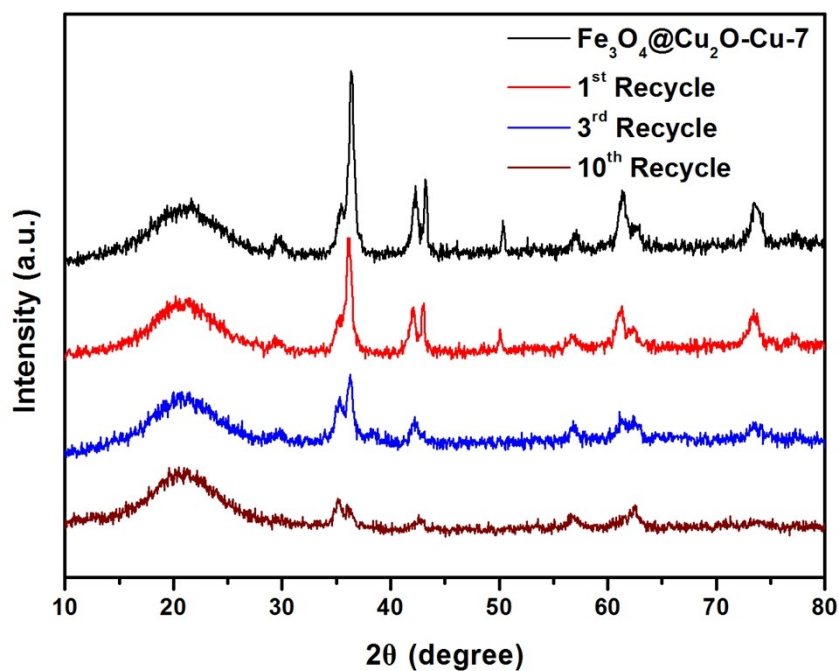

**Fig. S4** Comparison of p-XRD spectra of fresh and reused catalysts of  $\text{Fe}_3\text{O}_4@\text{Cu}_2\text{O-Cu-7}$  nanomaterial.

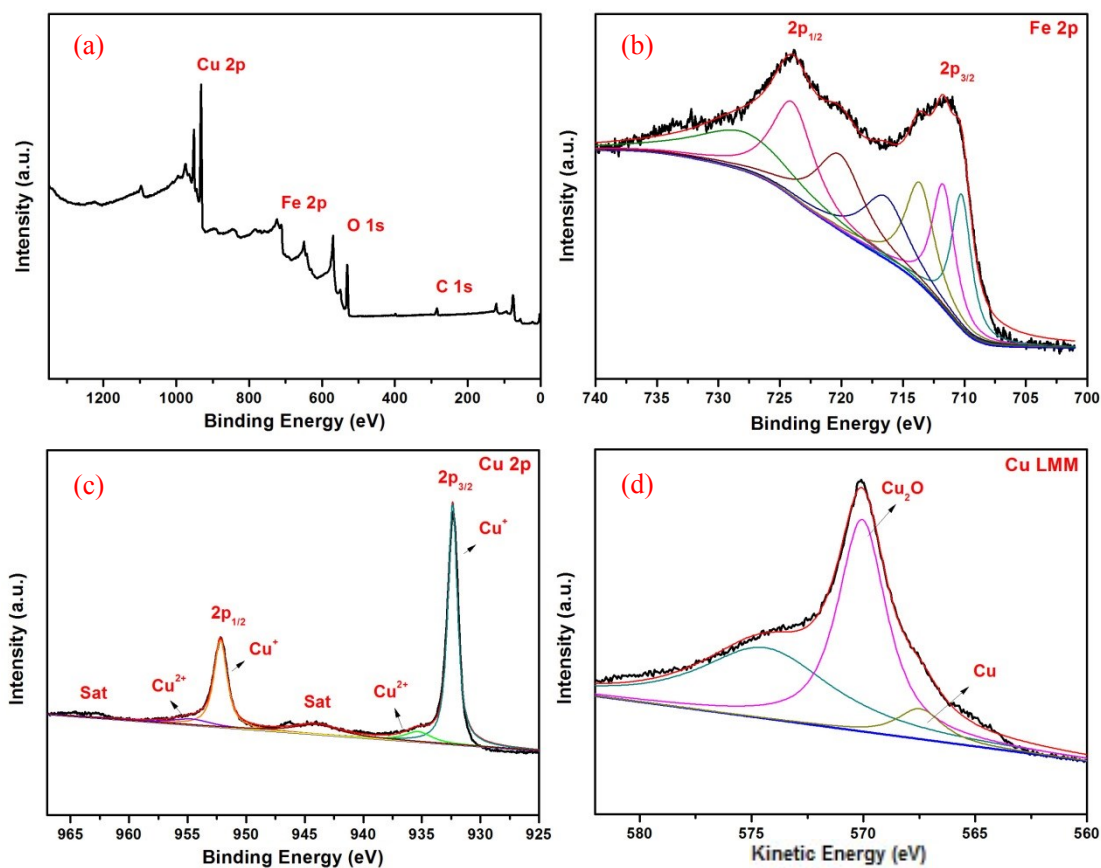

**Fig. S5** XPS spectra of core shell  $\text{Fe}_3\text{O}_4@ \text{Cu}_2\text{O-Cu-7}$  nanomaterial: (a) Survey spectrum; (b) Fe 2p; (c) Cu 2p; (d) Cu LMM Auger spectra.

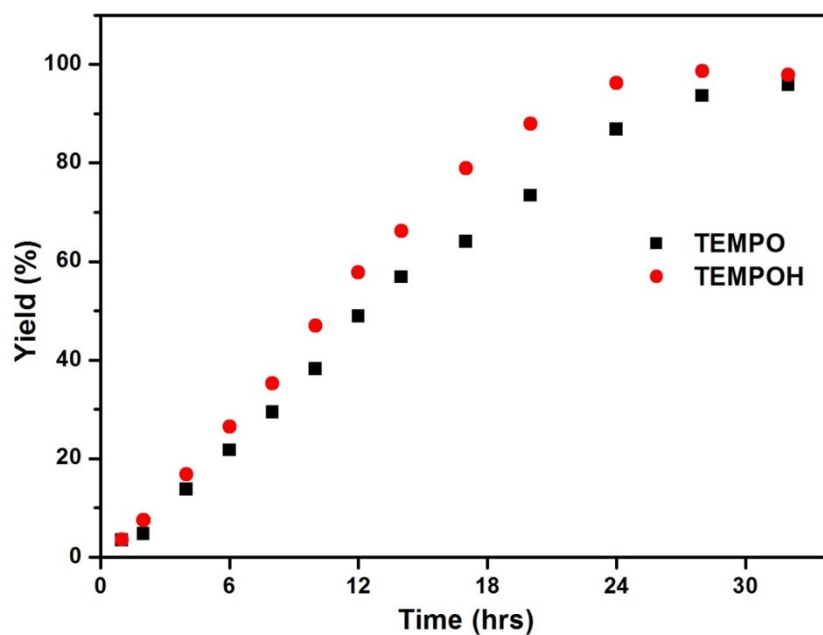

**Fig. S6** Comparison for the effect of TEMPO and TEMPOH on the catalysis.

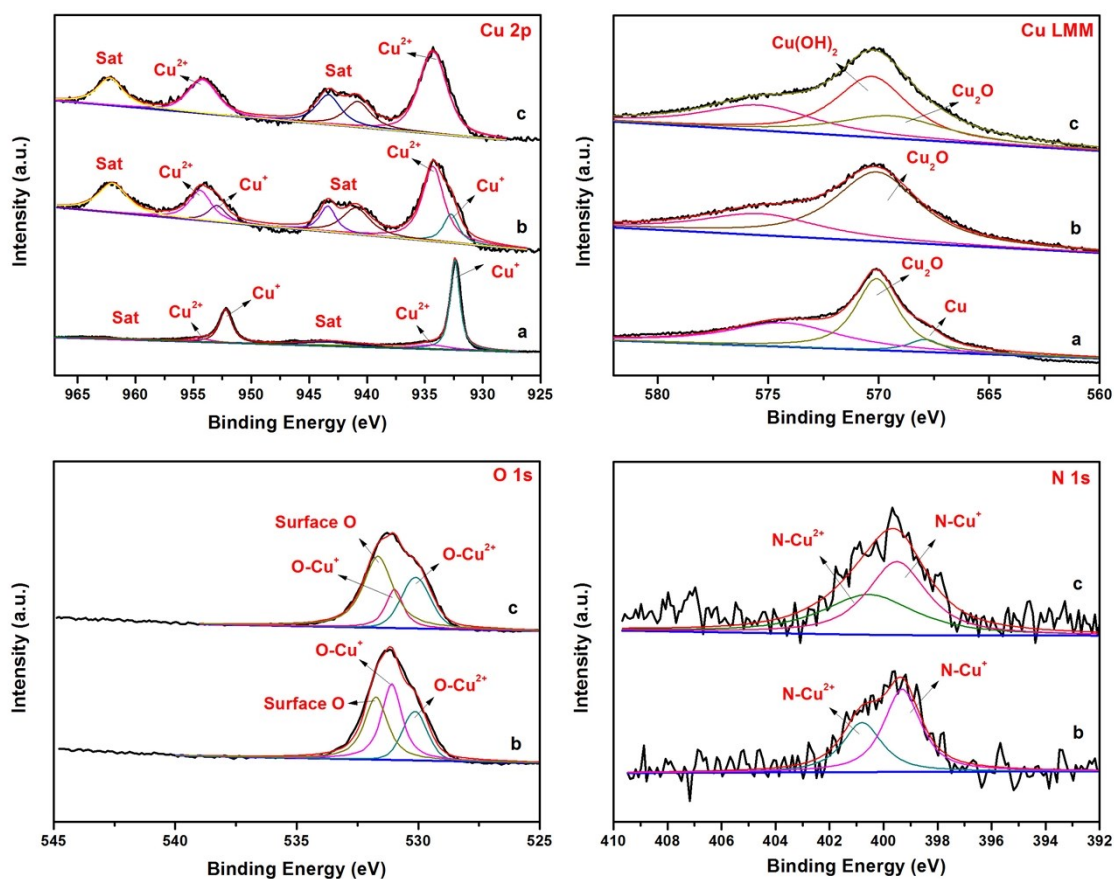

**Fig. S7** Comparison of XPS spectra of fresh and recycled  $\text{Fe}_3\text{O}_4@\text{Cu}_2\text{O-Cu-7}$  nanomaterial: Cu 2p (Top left), Cu LMM (Top right), O 1s (Bottom left) and N 1s (Bottom right); (a) fresh catalyst, (b) 3<sup>th</sup> recycling and (c) 7<sup>th</sup> recycling.

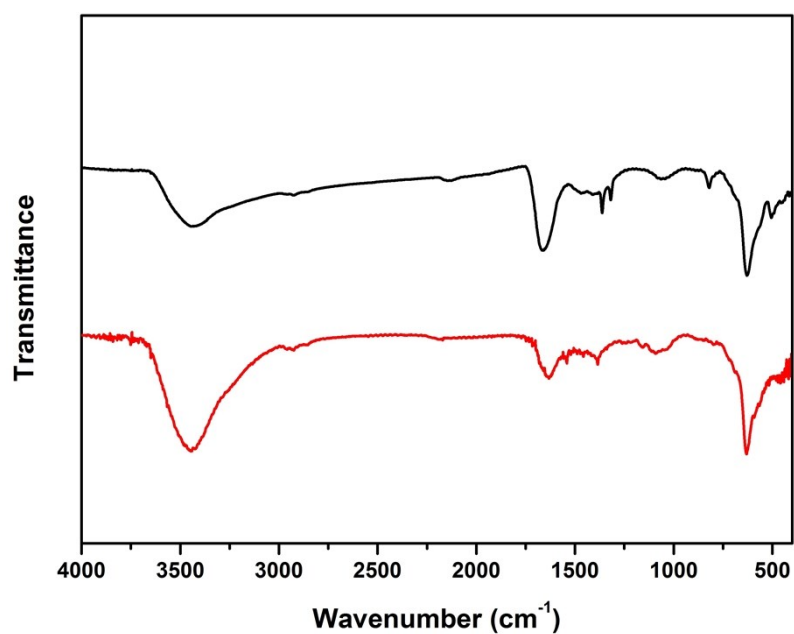

**Fig. S8** Comparison of FTIR spectroscopy for  $\text{Fe}_3\text{O}_4@\text{Cu}_2\text{O}$  before (black) and after (red) use.

**Table S4** The binding energies (eV) of XPS results of Cu, O, N in Fe<sub>3</sub>O<sub>4</sub>@Cu<sub>2</sub>O nanomaterial.

|                          | Cu <sup>+</sup><br>2p <sub>3/2</sub> | Cu <sup>2+</sup><br>2p <sub>3/2</sub> | Cu <sup>2+</sup><br>Sat. | Cu <sup>+</sup><br>2p <sub>1/2</sub> | Cu <sup>2+</sup><br>2p <sub>1/2</sub> | Cu <sup>2+</sup><br>Sat. | Cu<br>LMM          | O 1s                                                               | N 1s                                       |
|--------------------------|--------------------------------------|---------------------------------------|--------------------------|--------------------------------------|---------------------------------------|--------------------------|--------------------|--------------------------------------------------------------------|--------------------------------------------|
| Fresh catalyst           | 932.3                                | 934.4                                 | 941.0,<br>943.6          | 952.1                                | 954.2                                 | 962.0                    | 570.0              | 530.1 <sup>a</sup> ,<br>530.9 <sup>b</sup> ,<br>531.9 <sup>c</sup> | 398.6                                      |
| Related peak area        | 54850.2                              | 39365.7                               | 10929.5,<br>16092.5      | 25535.8                              | 16311.4                               | 7495.7                   | 37999.4            | 27739.1,<br>15107.2,<br>15852.8                                    | 1018.1                                     |
| 4 <sup>th</sup> recycles | 932.5                                | 934.1                                 | 941.0,<br>943.6          | 952.3                                | 954.2                                 | 962.0                    | 568.5,<br>570.0    | 530.1 <sup>a</sup> ,<br>531.0 <sup>b</sup> ,<br>531.7 <sup>c</sup> | 399.3 <sup>d</sup> ,<br>400.7 <sup>e</sup> |
| Related peak area        | 11906.0                              | 78094.1                               | 53694.9,<br>14298.4      | 6249.1                               | 38933.9                               | 35029.1                  | 7526.8,<br>38349.3 | 13212.8,<br>33826.3,<br>20513.8                                    | 1810.4,<br>748.2                           |
| 7 <sup>th</sup> recycles | 932.5                                | 934.1                                 | 940.8,<br>943.5          | 952.4                                | 954.2                                 | 961.9                    | 568.5,<br>570.0    | 530.1 <sup>a</sup> ,<br>531.0 <sup>b</sup> ,<br>531.8 <sup>c</sup> | 399.3 <sup>d</sup> ,<br>400.7 <sup>e</sup> |
| Related peak area        | 12248.2                              | 49413.2                               | 29391.4,<br>11236.6      | 5909.6                               | 23561.6                               | 23920.4                  | 8334.9,<br>20184.0 | 19151.3,<br>18067.7,<br>17872.2                                    | 2074.9,<br>1232.0                          |

<sup>a, e</sup> Binding to Cu<sup>2+</sup>, <sup>b, d</sup> Binding to Cu<sup>+</sup>, <sup>c</sup> Surface O.

**Table S5** The binding energies (eV) of XPS results of Cu, O, N in Fe<sub>3</sub>O<sub>4</sub>@Cu<sub>2</sub>O-Cu-7 nanomaterial.

|                          | Cu <sup>+</sup><br>2p <sub>3/2</sub> | Cu <sup>2+</sup><br>2p <sub>3/2</sub> | Cu <sup>2+</sup><br>Sat. | Cu <sup>+</sup><br>2p <sub>1/2</sub> | Cu <sup>2+</sup><br>2p <sub>1/2</sub> | Cu <sup>2+</sup><br>Sat. | Cu<br>LMM            | O 1s                                                               | N 1s                                       |
|--------------------------|--------------------------------------|---------------------------------------|--------------------------|--------------------------------------|---------------------------------------|--------------------------|----------------------|--------------------------------------------------------------------|--------------------------------------------|
| Fresh catalyst           | 932.4                                | 934.3                                 | 940.8,<br>943.3          | 952.2                                | 954.2                                 | 962.0                    | 568.0,<br>570.1      | /                                                                  | /                                          |
| Rel. peak area           | 469444.2                             | 73972.6                               | 57290.9,<br>100990.8     | 229259.4                             | 30916.3                               | 28193.7                  | 56832.5,<br>246334.5 | /                                                                  | /                                          |
| 3 <sup>rd</sup> recycles | 932.3                                | 934.3                                 | 940.8,<br>943.3          | 952.2                                | 954.2                                 | 962.0                    | 569.5                | 530.1 <sup>a</sup> ,<br>531.1 <sup>b</sup> ,<br>531.7 <sup>c</sup> | 399.2 <sup>d</sup> ,<br>400.6 <sup>e</sup> |
| Related peak area        | 12880.2                              | 67982.0                               | 26668.5,<br>18075.8      | 6663.8                               | 30746.9                               | 30361.0                  | 139149.8             | 15214.7,<br>24859.0,<br>23333.8                                    | 1799.2,<br>1865.6                          |
| 7 <sup>th</sup> recycles | -                                    | 934.3                                 | 940.8,<br>943.3          | -                                    | 954.2                                 | 962.2                    | 569.5,<br>570.4      | 530.1 <sup>a</sup> ,<br>531.0 <sup>b</sup> ,<br>531.7 <sup>c</sup> | 399.4 <sup>d</sup> ,<br>400.9 <sup>e</sup> |
| Related peak area        | -                                    | 68414.3                               | 22116.6,<br>24452.7      | -                                    | 29909.2                               | 23943.7                  | 48888.1,<br>107052.3 | 18663.5,<br>10791.6,<br>33820.5                                    | 1890.5,<br>941.9                           |

<sup>a, e</sup> Binding to Cu<sup>2+</sup>, <sup>b, d</sup> Binding to Cu<sup>+</sup>, <sup>c</sup> Surface O. “-” Not detected. “/” Not tested.



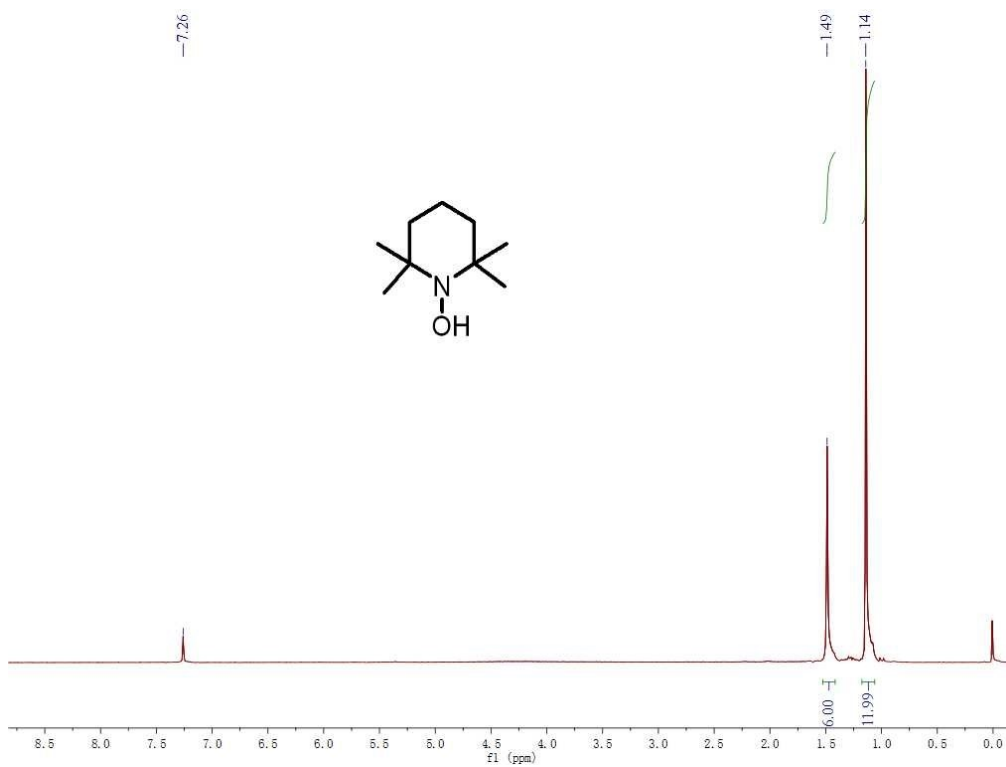

**Fig. S9** <sup>1</sup>H-NMR spectrum of TEMPOH

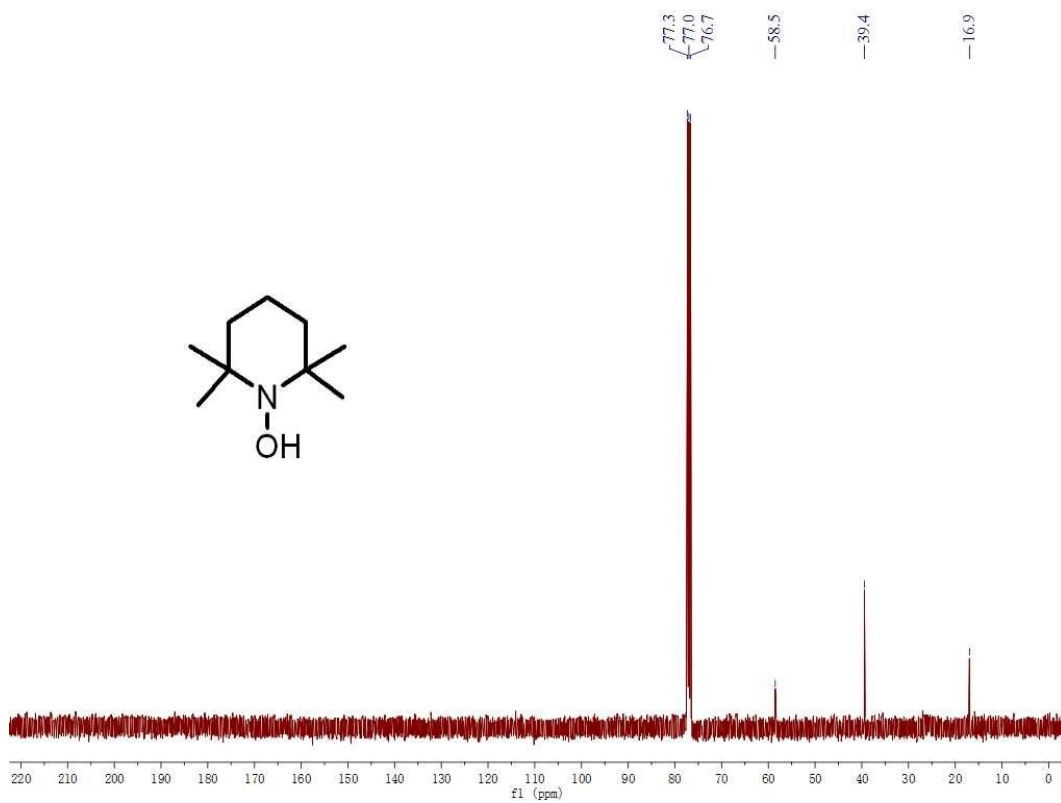

**Fig. S10** <sup>13</sup>C-NMR spectrum of TEMPOH

**Reference:**

1. Q. Hua, K. Chen, S. Chang, H. Bao, Y. Ma, Z. Jiang and W. Huang, *RSC Advances*, 2011, **1**, 1200-1203.
2. Y. Zhu, L. Li, and Z. Shen, *Chem.Eur.J.*, 2015, **21**, 13246-13252.
